# Supplementary material for: Retrieval of aerosol properties from ceilometer and photometer measurements: long-term evaluation with in-situ data and statistical analysis at Montsec (southern Pyrenees)
Source: Copernicus journal article supplement (doi:10.5194/amt-2018-431), 2019-02-04
Supplement: Supplementary file 1 [file amt-2018-431-supplement.pdf]

## Supplementary material

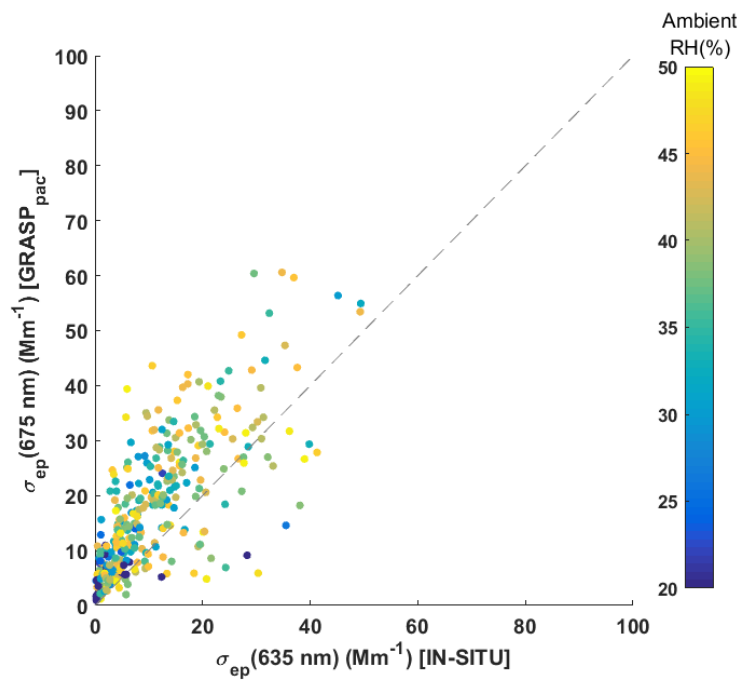

Figure S1: Scatterplot of the aerosol extinction coefficient retrieved with GRASP<sub>pac</sub> and measured in-situ for  $\text{RH}_{\text{ambient}} < 50\%$ . The colour scale represents the ambient RH and the dashed line is the 1:1 line.

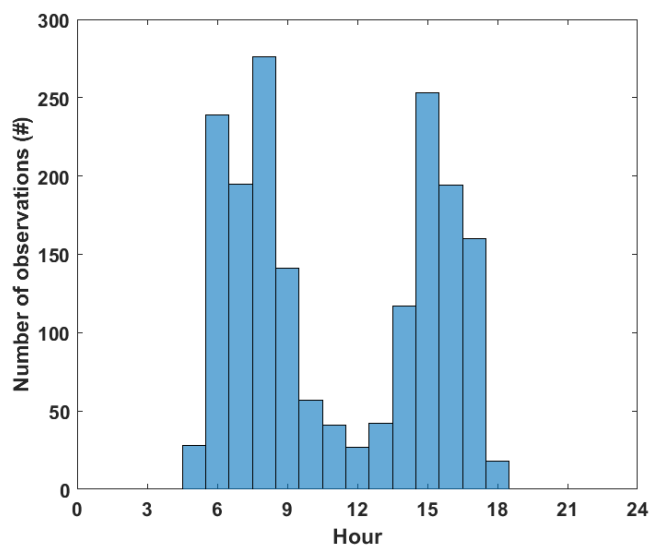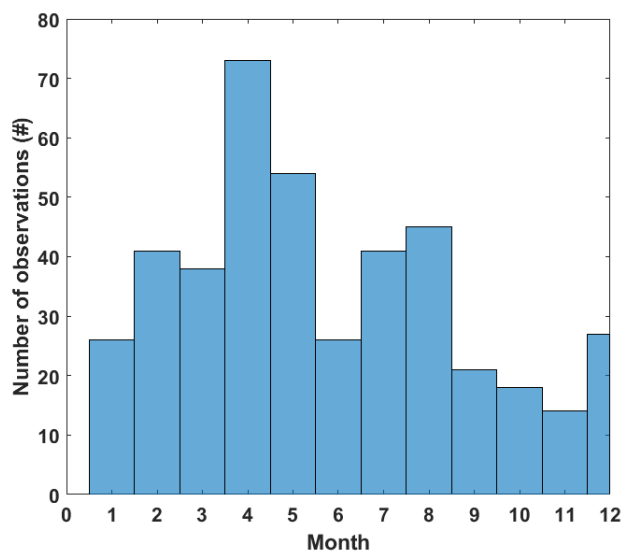

**Figure S2:** Frequency distributions of the number of profiles retrieved with GRASP<sub>pac</sub> as a function of hour of the day (upper panel) and month (lower panel).
